# Supplementary material for: Attenuated viral hepatitis in Trem1−/− mice is associated with reduced inflammatory activity of neutrophils
Source: PubMed Central journal article supplement (PMC4916511; doi:10.1038/srep28556), 2016-06-22

# **Attenuated viral hepatitis in *Trem1*<sup>-/-</sup> mice is associated with reduced inflammatory activity of neutrophils**

**Jan-Hendrik Kozik<sup>1</sup>, Tanja Trautmann<sup>1</sup>, Antonella Carambia<sup>1</sup>, Max Preti<sup>1</sup>, Marc Lütgehetmann<sup>2</sup>, Till Krech<sup>3</sup>, Christiane Wiegard<sup>1</sup>, Joerg Heeren<sup>4</sup>, Johannes Herkel<sup>1,\*</sup>**

<sup>1</sup>University Medical Centre Hamburg-Eppendorf, Department of Medicine I, 20246 Hamburg, Germany

<sup>2</sup>University Medical Centre Hamburg-Eppendorf, Institute of Medical Microbiology, Virology and Hygiene, 20246 Hamburg, Germany

<sup>3</sup>University Medical Centre Hamburg-Eppendorf, Institute of Pathology, 20246 Hamburg, Germany

<sup>3</sup>University Medical Centre Hamburg-Eppendorf, Institute of Biochemistry and Molecular Cell Biology, 20246 Hamburg, Germany

\*Correspondence to [jherkel@uke.de](mailto:jherkel@uke.de)

## **Supplementary Information**

## Supplementary Figure S1

Frozen liver sections of C57BL/6 mice 9 days after infection with LCMV were stained for TREM1 (green) and nuclei were stained with Hoechst 33258 (blue), revealing that TREM1-expressing cells have polymorphic nuclei. The scale bar indicates a distance of 100  $\mu\text{m}$ .

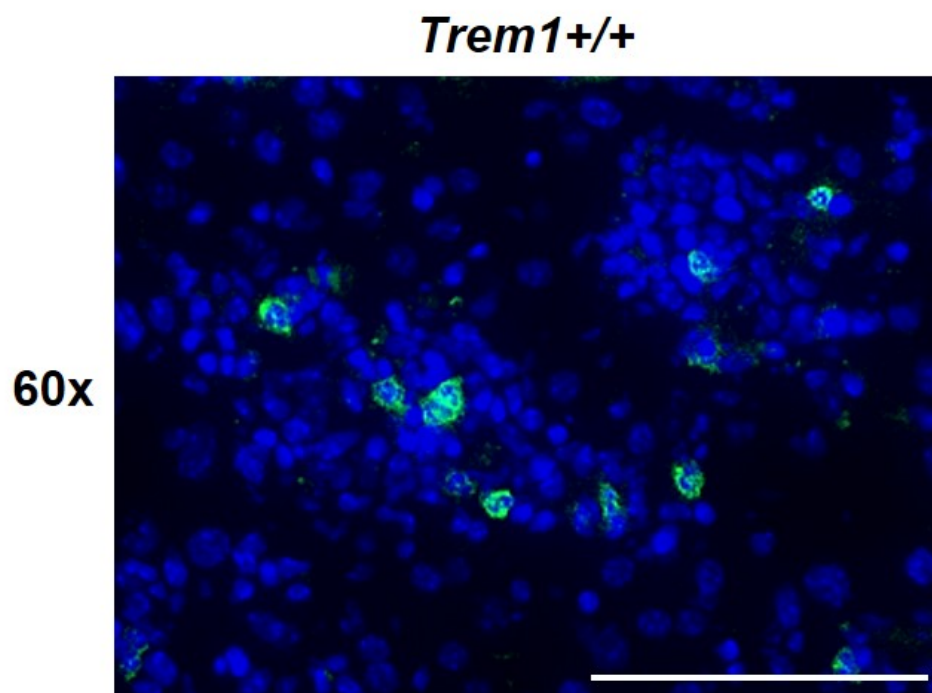

## Supplementary Figure S2

Frozen liver sections of C57BL/6 mice 9 days after infection with LCMV were stained for TREM1 (green) and F4/80 (red); nuclei were stained with Hoechst 33258 (blue). The scale bar indicates a distance of 100  $\mu\text{m}$ .

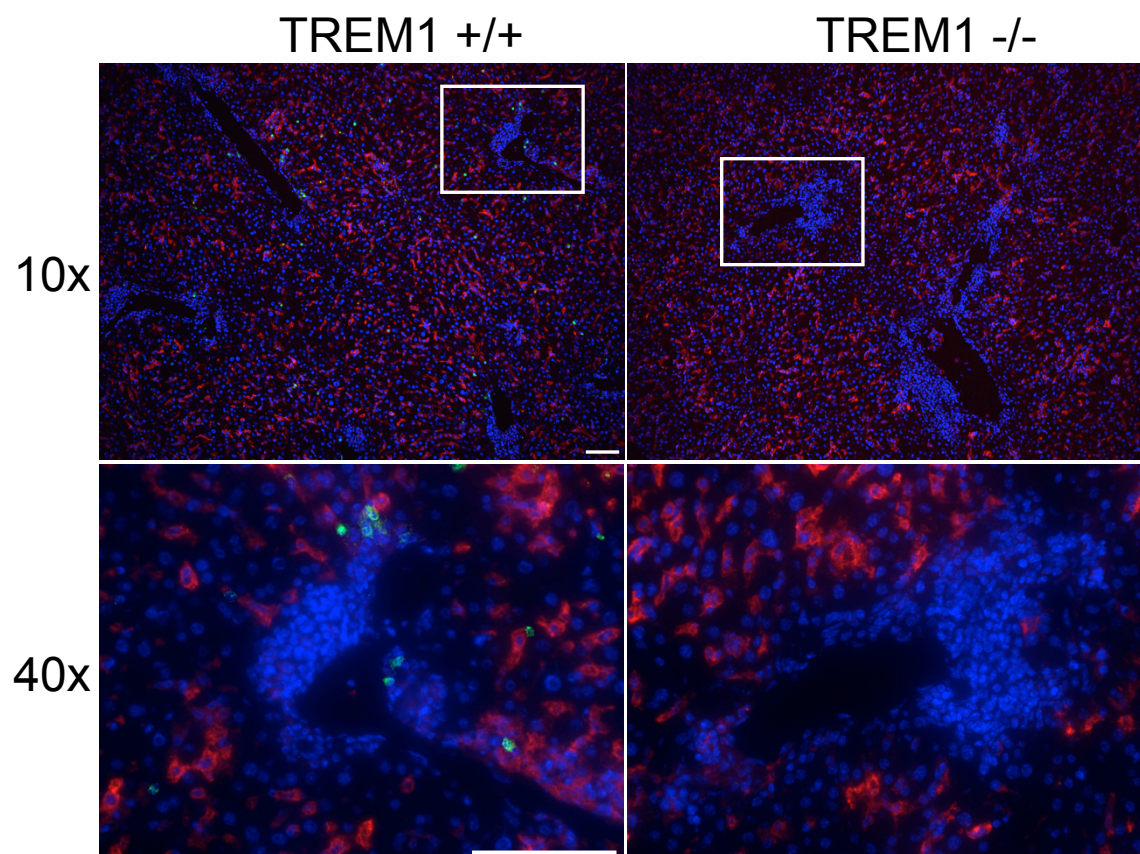

## Supplementary Figure S3

Frozen liver sections of C57BL/6 mice 9 days after infection with LCMV were stained for TREM1 (green) and Ly6C (red); nuclei were stained with Hoechst 33258 (blue). The scale bar indicates a distance of 100  $\mu\text{m}$ .

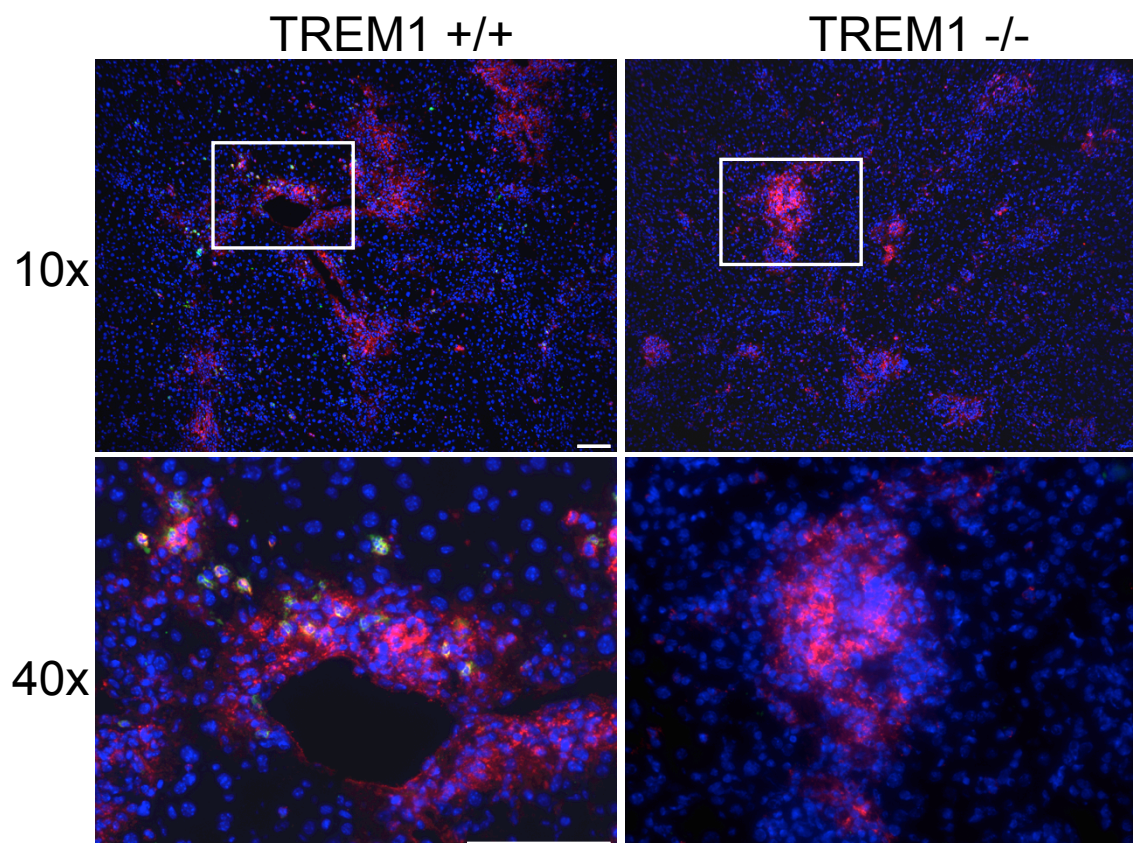



## Supplementary Figure S4

Frozen liver sections of C57BL/6 mice 9 days after infection with LCMV were stained for TREM1 (green), CD8 (red) and CD4 (cyan); nuclei were stained with Hoechst 33258 (blue). The scale bar indicates a distance of 100  $\mu\text{m}$ .

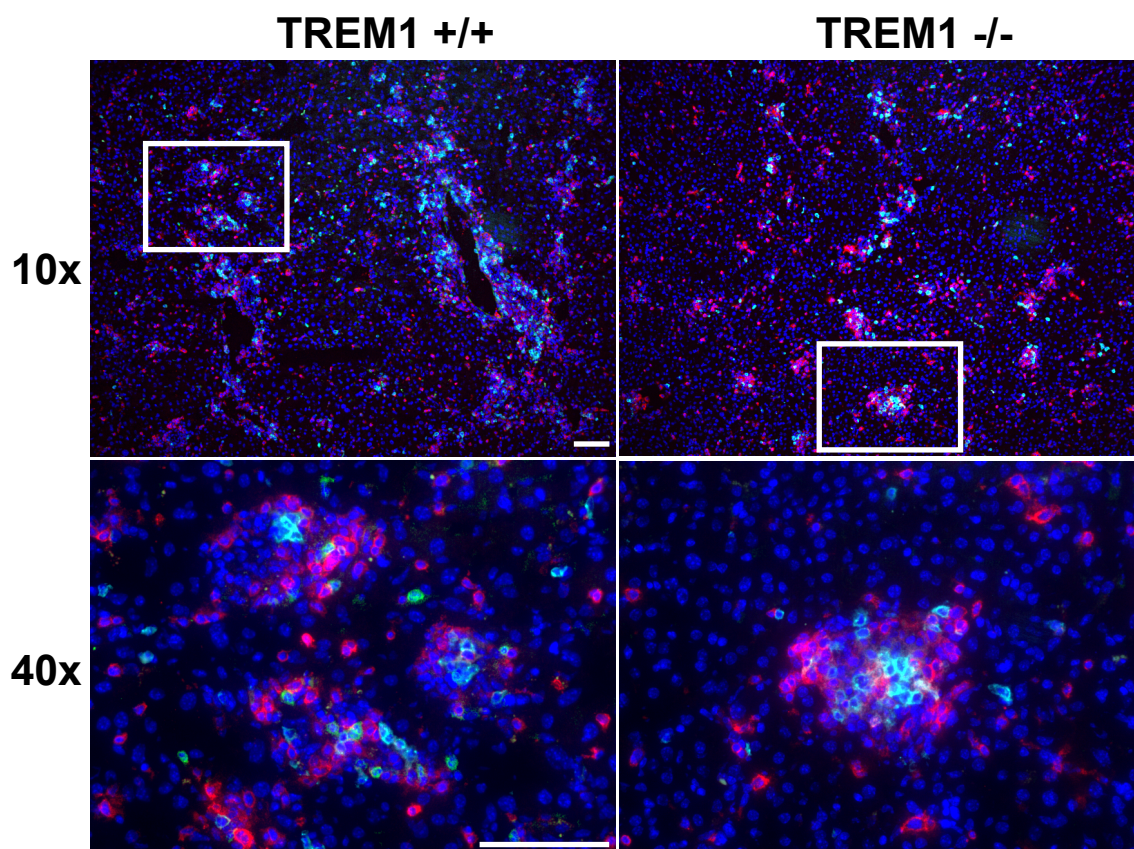

## Supplementary Figure S5

LCMV-infected C57BL/6 mice were repeatedly treated with neutrophil-depleting antibody ( $\alpha$ Ly6G) or isotype-matched control antibody. Frozen liver sections of these mice 9 days after infection with LCMV were stained for TREM1 (green) and Ly6G (red); nuclei were stained with Hoechst 33258 (blue). The scale bar indicates a distance of 50  $\mu$ m.

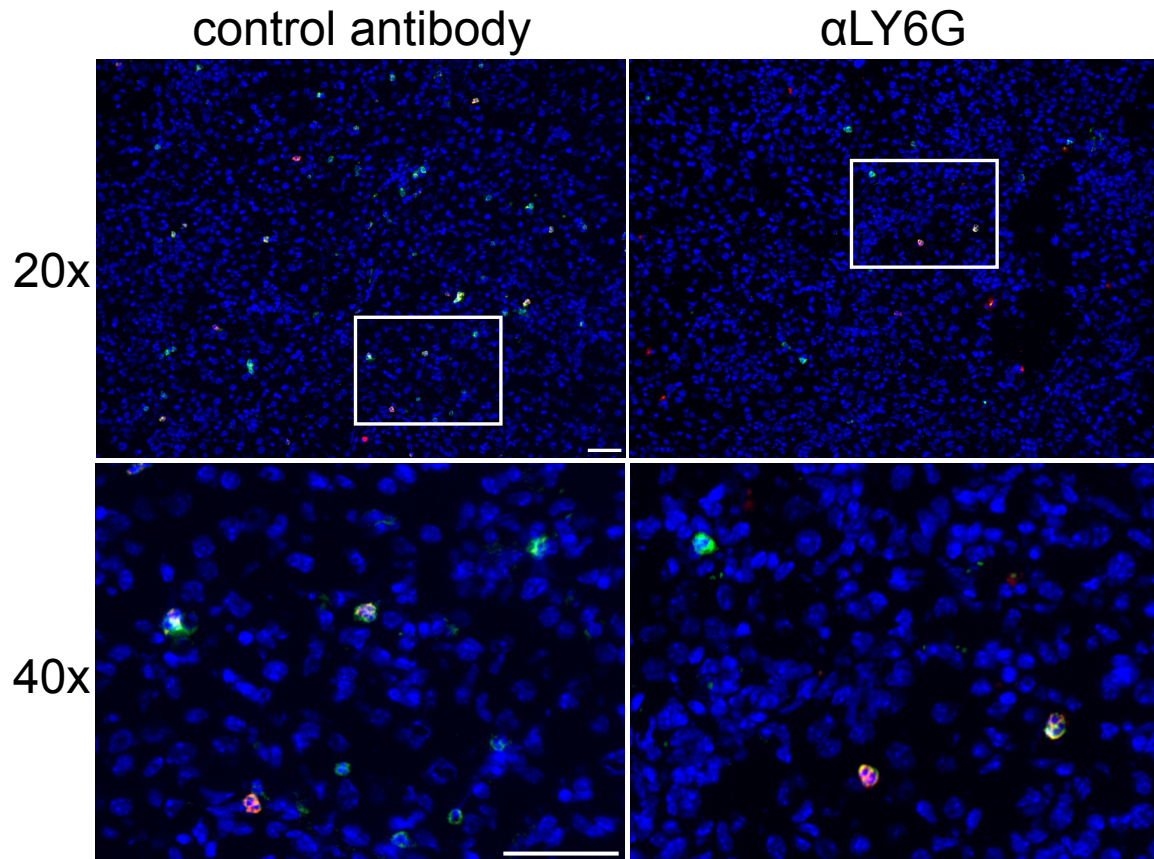

Supplement: srep28556-s1.pdf [file srep28556-s1.pdf]
